# Supplementary material
Source: PubMed Central journal article supplement (PMC2930026)

# Supplementary data

Figure 1S

K19<sup>YFP</sup> mice, BDL

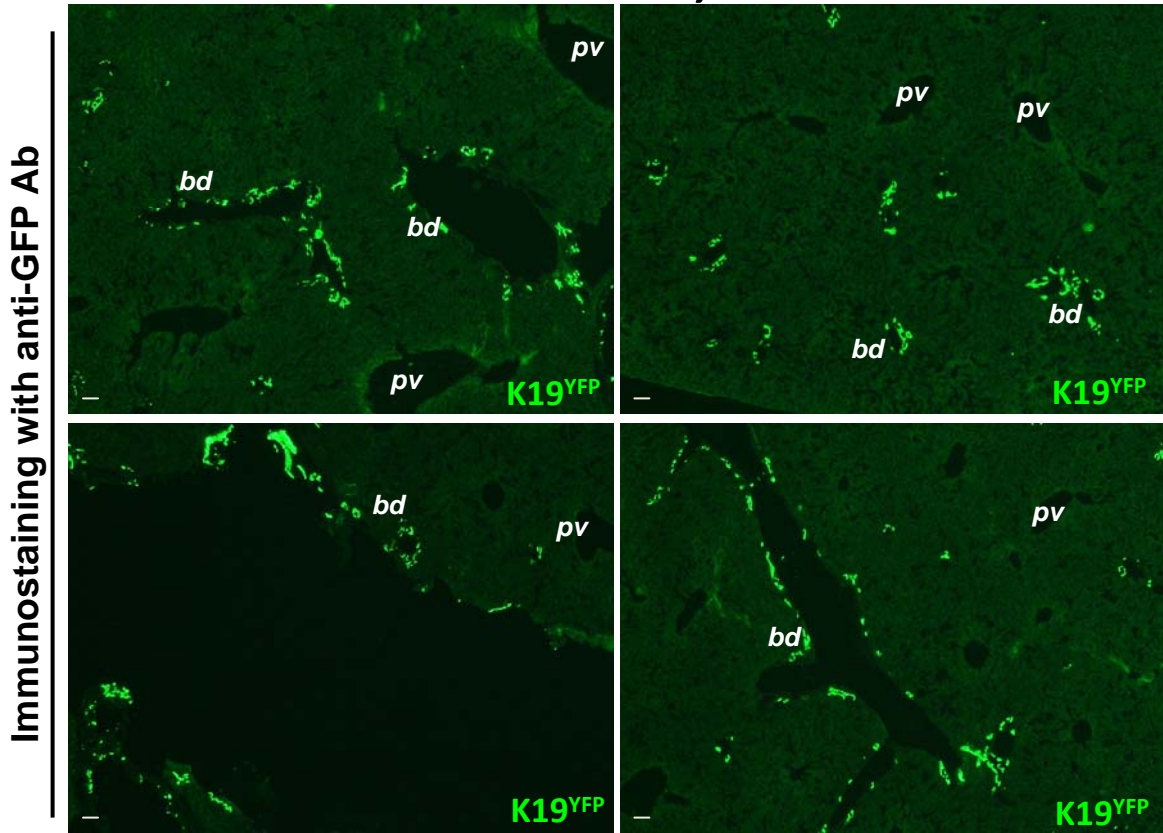

Figure 2S

K19<sup>YFP</sup> mice, BDL

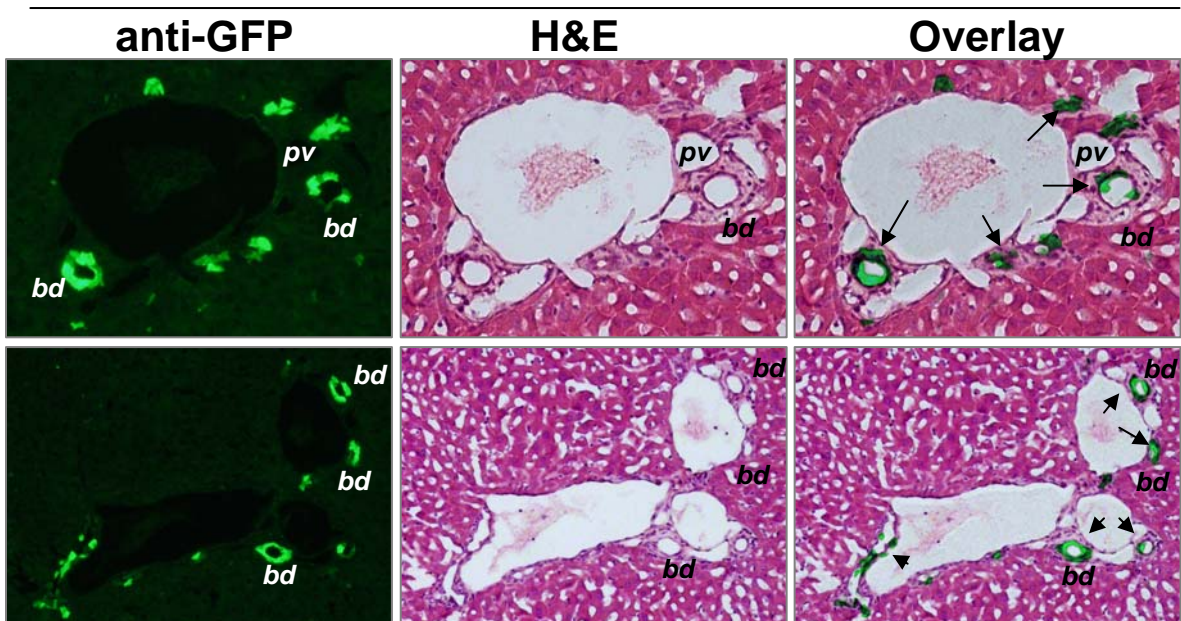

Figure 3S

### K19<sup>YFP</sup> mice, BDL

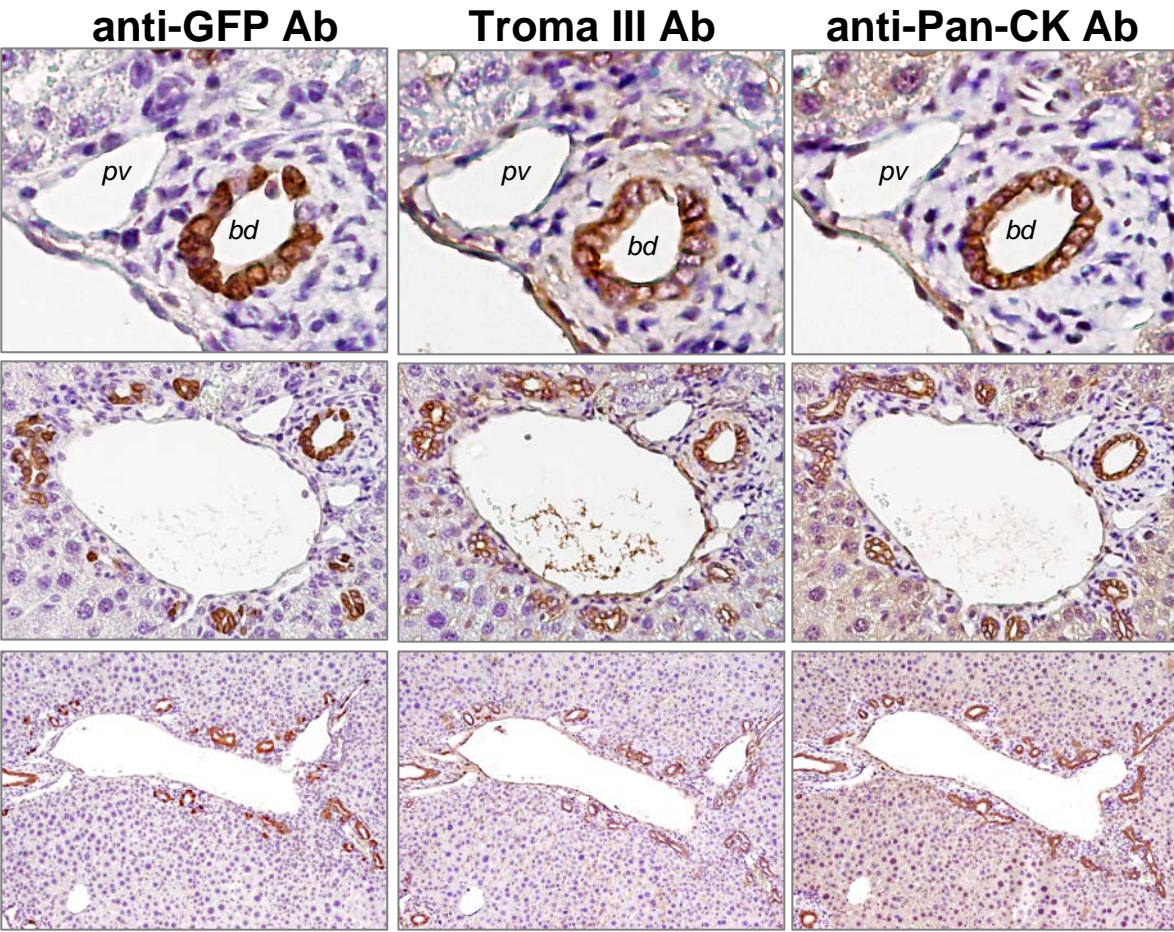

Figure 4S

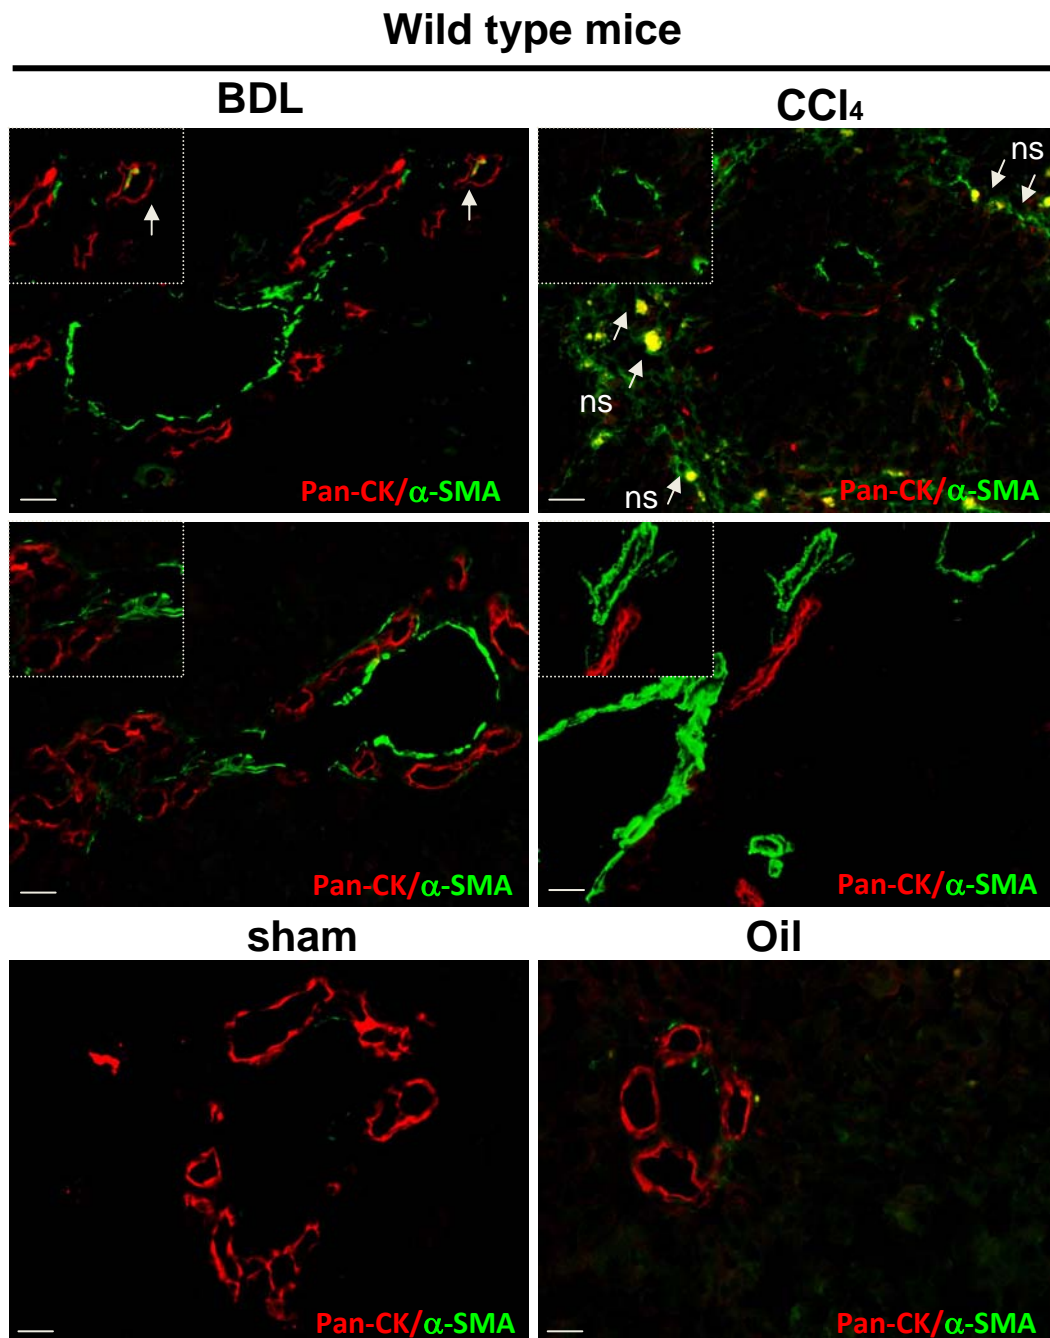

# Figure 5S

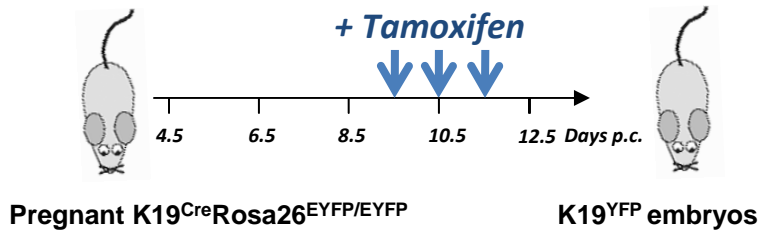

## Embryogenesis, E9.5

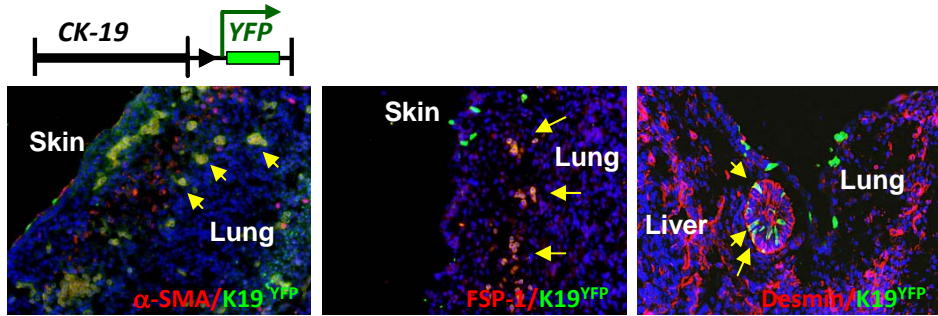

Supplement: NIHMS210068-supplement-02.pdf [file NIHMS210068-supplement-02.pdf]
